# Supplementary material for: Author Correction: Host susceptibility and structural and immunological insight of S proteins of two SARS-CoV-2 closely related bat coronaviruses
Source: PubMed Central journal article supplement (PMC10562437; doi:10.1038/s41421-023-00597-1), 2023-10-09
Supplement: 41421_2023_597_MOESM1_ESM.pdf [file 41421_2023_597_MOESM1_ESM.pdf]

## Supplementary information

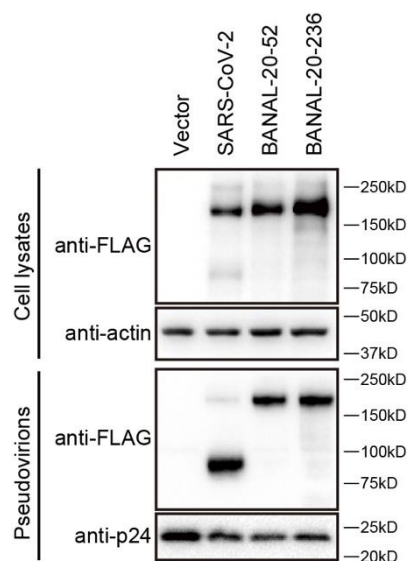

**Supplementary Fig. S1 Western blotting of SARS-CoV-2 S, BANAL-20-52 S and BANAL-20-236 S proteins.** The S protein was detected using mouse monoclonal anti-FLAG M2 antibody.  $\beta$ -actin and gag-p24 served as loading controls (cell lysates, top panel; pseudovirions, bottom panel).

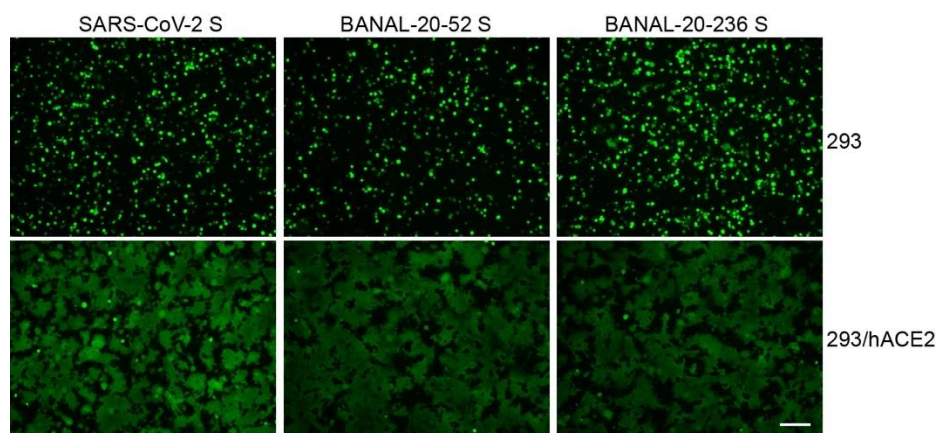

**Supplementary Fig. S2 Cell-cell fusion mediated by the S proteins of SARS-CoV-2, BANAL-20-52, and BANAL-20-236.** HEK293T cell transiently overexpressing S proteins and GFP protein were lifted with trypsin and then overlaid on 293/hACE2 cells. After 3 hours of co-culturation, images of cell-cell fusion were captured. Scale bar, 100  $\mu$ M.

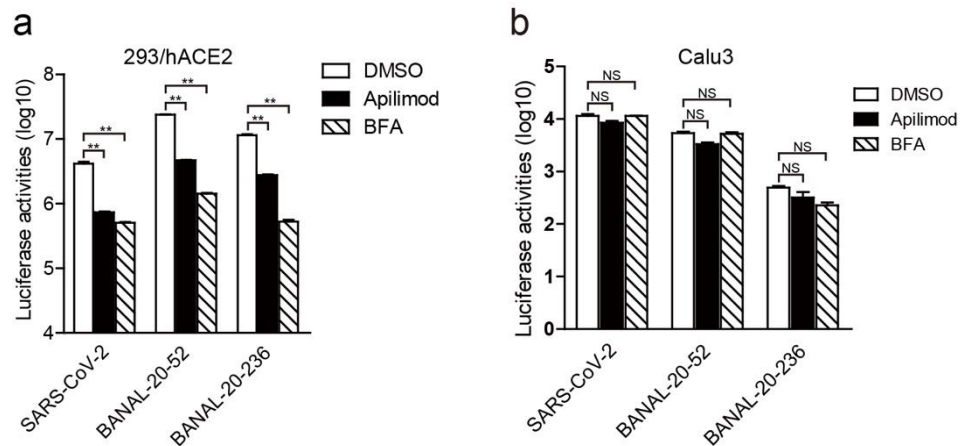

**Supplementary Fig S3. Inhibition of entry of SARS-CoV-2 S, BANAL-20-52 S, and BANAL-20-236 S pseudovirions by apilimod and bafilomycin A1.** (a and b) Inhibition of entry of SARS-CoV-2 S, BANAL-20-52 S, and BANAL-20-236 S pseudovirions into 293/hACE2 (a) and Calu3 (b) cells by the PIKfyve inhibitor apilimod (API) or the vacuolar H<sup>+</sup>-ATPase inhibitor bafilomycin A1 (BFA). Data are represented as mean  $\pm$  standard deviation (SD) from at least triplicates. p values in (a) and (b) are calculated by unpaired two-sided Student's t test. \*p < 0.05; \*\*p < 0.01; and ns, p > 0.05.

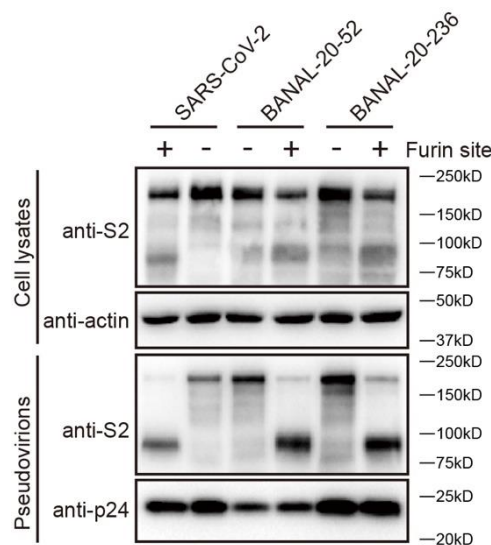

**Supplementary Fig. S4 Western blotting of SARS-CoV-2 S, BANAL-20-52 S and BANAL-20-236 S proteins with or without a furin cleavage site.** S proteins were detected using rabbit polyclonal anti-SARS-CoV-2 S2 antibody 40590-T62.  $\beta$ -actin and gag-p24 served as loading controls (cell lysates, top panel; pseudovirions, bottom panel).

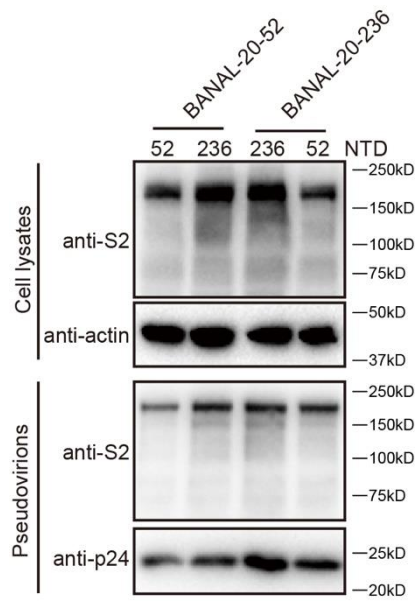

**Supplementary Fig. S5 Western blot analysis of chimeric mutant BANAL-20-52 and BANAL-20-236 S proteins.** S proteins were detected using rabbit polyclonal anti-SARS-CoV-2 S2 antibody 40590-T62.  $\beta$ -actin and gag-p24 served as loading controls (cell lysates, top panel; pseudovirions, bottom panel)

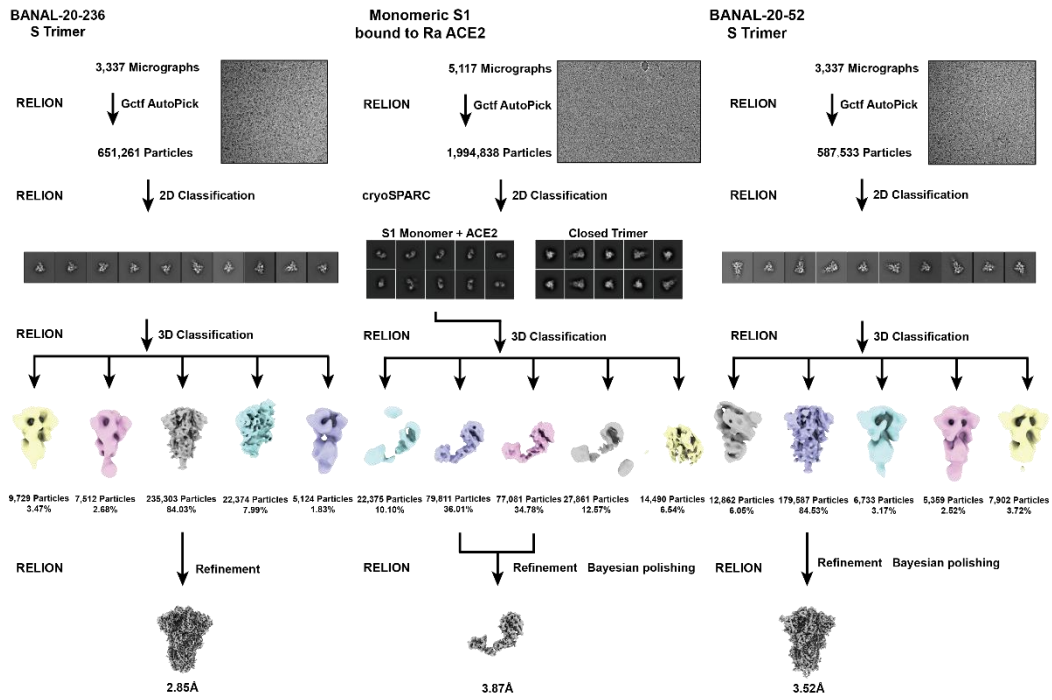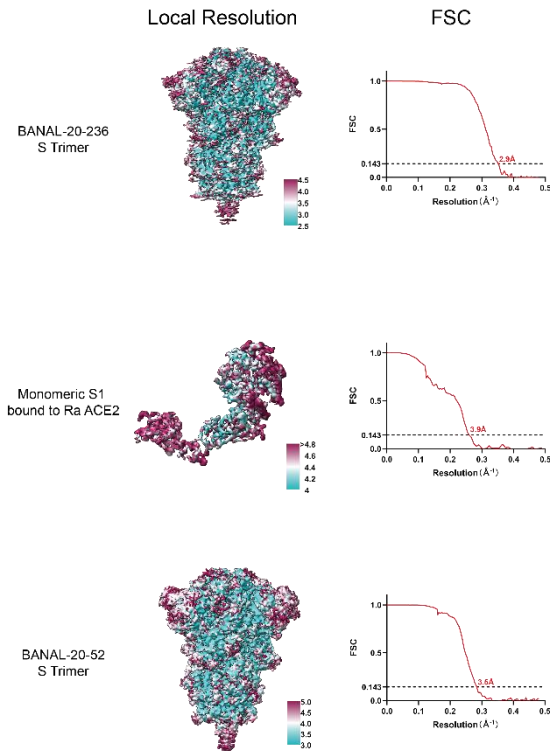

**Supplementary Fig. S6 Processing schemes for cryo-EM data processing, and Fourier Shell Correlations (FSCs) and local resolution estimates for calculated maps.**

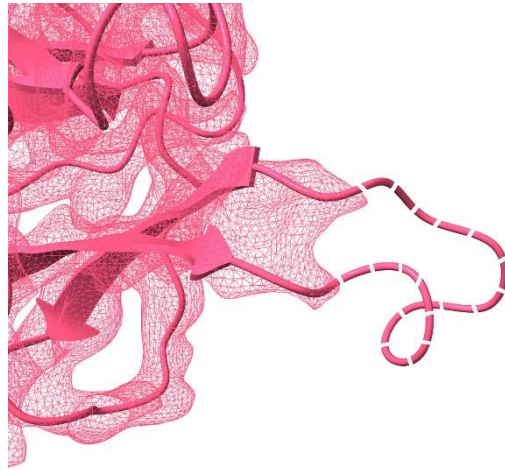

**Supplementary Fig. S7** The structural and electronic map close to the furin site of BANAL-20-236 (PDBID: 8I3W). Dashed line indicates the potential structure of the furin site.

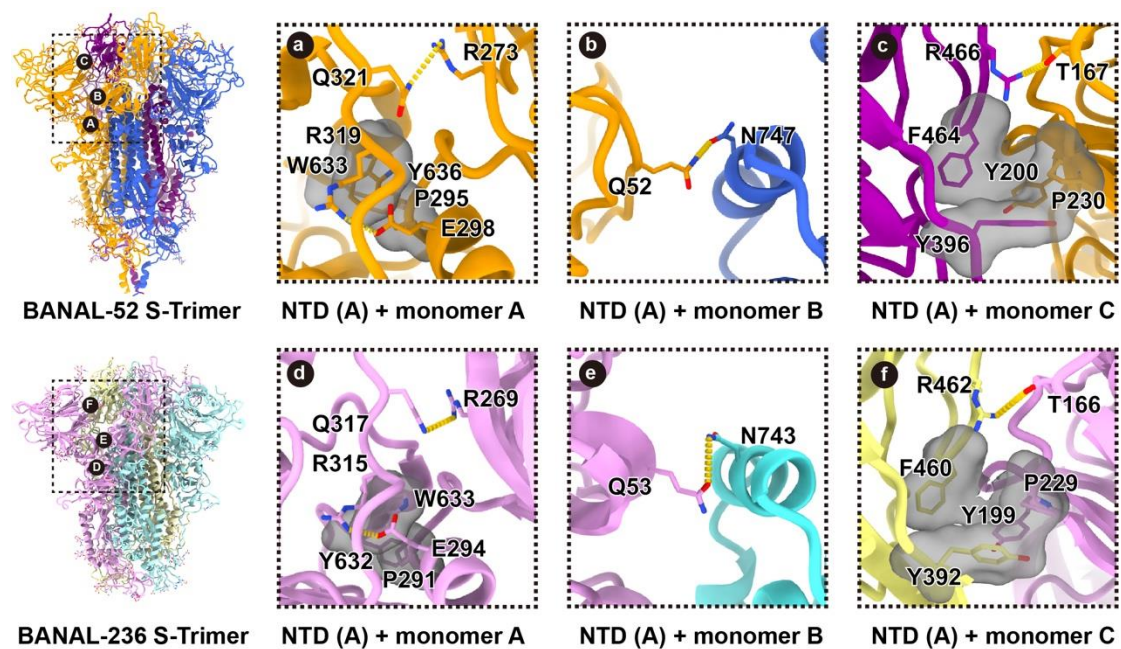

**Supplementary Fig. S8** The representative interactions between NTDs with other regions of the S trimers of BANAL-20-52 (a, b, c) and BANAL-20-236 (d, e, f). While the individual monomers of BANAL-52 S trimer are colored as orange, blue, and purple, the individual monomers of BANAL-236 were colored as pink, cyan, and yellow, respectively. The hydrogen bonding and salt bridge are shown as the dashed yellow line, and the bulked electron cloud indicates the hydrophobic interactions.

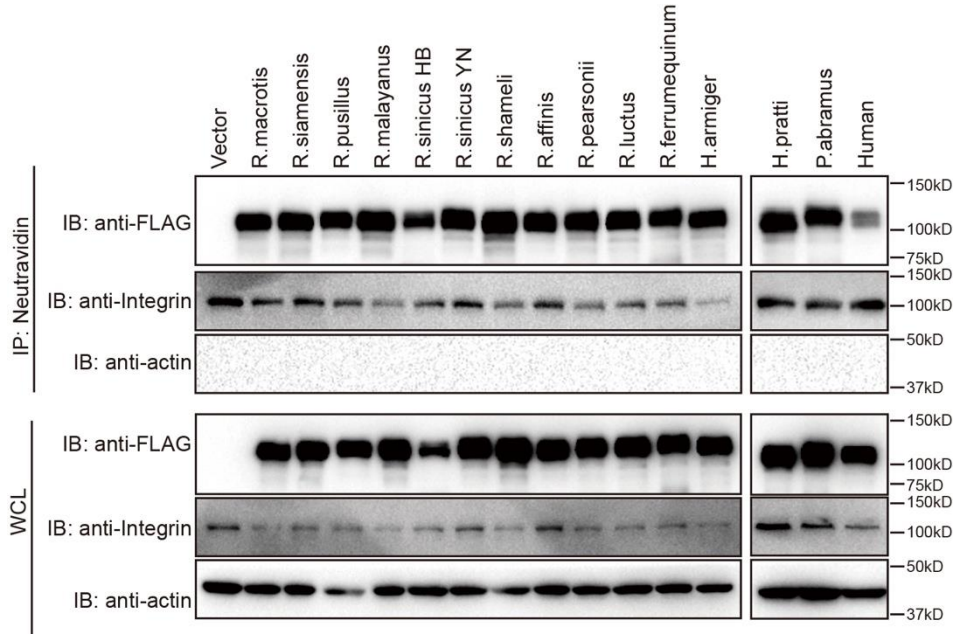

**Supplementary Fig. S9 Cell surface expression of different bat ACE2 orthologs.** HEK293 cells transiently overexpressing different bat species ACE2 proteins were labeled with EZ-link Sulfo-NHS-LC-LC-biotin on ice, and lysed with RIPA buffer. Biotinylated proteins were enriched with NeutrAvidin beads and analyzed by Western blotting using mouse monoclonal anti-FLAG M2 antibody. Integrin beta chain and  $\beta$ -actin were used as loading controls. WCL, whole cell lysate.

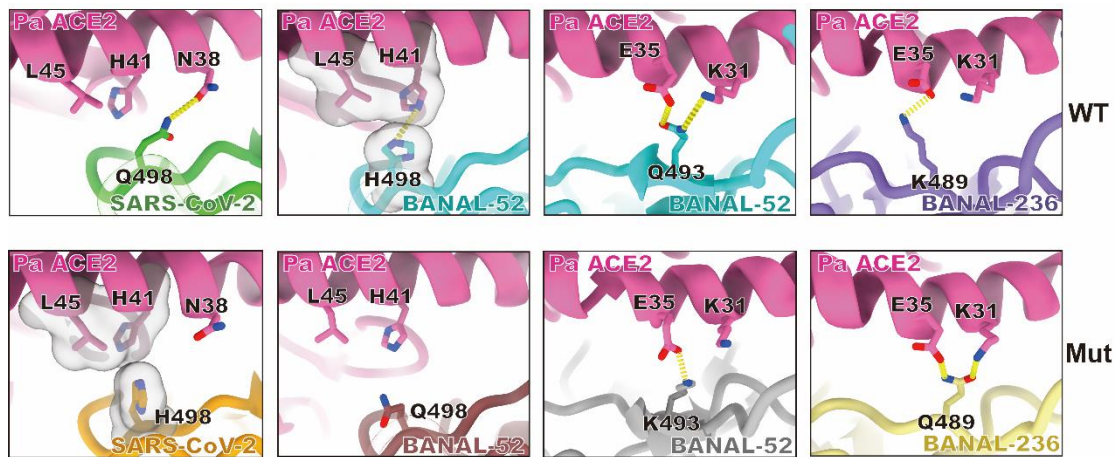

**Supplementary Fig. S10 In silico analysis of interaction between *P. abramus* ACE2 and RBDs.**

MD simulated interactions between *P. abramus* ACE2 and RBD of BANAL-20-236/52, SARS-CoV-2 mutants. Structures of the RBD and ACE2 are shown as ribbons.

|                                                                                  | 372                                             |  |
|----------------------------------------------------------------------------------|-------------------------------------------------|--|
| SARS-CoV-2                                                                       | D Y S V L Y N S A - S F S T F K C Y G V S P T K |  |
| MZ937001 BANAL-20-103/Laos/2020                                                  | . . . . . T - . . . . .                         |  |
| MZ937003 BANAL-20-236/Laos/2020                                                  | . . . . . T - . . . . .                         |  |
| MZ937000 BANAL-20-52/Laos/2020                                                   | . . . . . T - . . . . .                         |  |
| GU190215 Bat coronavirus BM48-31/BGR/2008                                        | . . . . . S A . . . . . Q . . . . .             |  |
| KY352407 SARS-related coronavirus strain BtKY72                                  | . . . . . A . . . . . S S . . . . .             |  |
| LC556375 SARS-related coronavirus Rc-o319                                        | . . . . . T - . . . . . Q . . . . . S . . . . . |  |
| MN996532 Bat coronavirus RaTG13                                                  | . . . . . T - . . . . .                         |  |
| MT040333 Pangolin coronavirus isolate PCoV GX-P4L                                | . . . . . T - . . . . .                         |  |
| MT040334 Pangolin coronavirus isolate PCoV GX-P1E                                | . . . . . T - . . . . .                         |  |
| MT040335 Pangolin coronavirus isolate PCoV GX-P5L                                | . . . . . T - . . . . .                         |  |
| MT040336 Pangolin coronavirus isolate PCoV GX-P5E                                | . . . . . T - . . . . .                         |  |
| MT072864 Pangolin coronavirus isolate PCoV-P2V                                   | . . . . . T - . . . . .                         |  |
| MT072865 Pangolin coronavirus isolate PCoV-P3B                                   | . . . . . T - . . . . . R . . . . .             |  |
| MT121216 Pangolin coronavirus isolate MP789                                      | . . . . . T - . . . . .                         |  |
| MT726043 Sarbecovirus sp isolate PREDICT/PDF-2386/OTBA40RSV                      | . . . . . S S . . . . .                         |  |
| MT726045 Sarbecovirus sp isolate PREDICT/PRD-0038/AABSMF                         | . . . . . S S . . . . .                         |  |
| MT799521 Pangolin coronavirus isolate cDNA8                                      | . . . . . T - . . . . .                         |  |
| MT799522 Pangolin coronavirus isolate cDNA9                                      | . . . . . T - . . . . .                         |  |
| MT799523 Pangolin coronavirus isolate cDNA16                                     | . . . . . T - . . . . .                         |  |
| MT799524 Pangolin coronavirus isolate cDNA18                                     | . . . . . T - . . . . .                         |  |
| MT799525 Pangolin coronavirus isolate cDNA20                                     | . . . . . T - . . . . .                         |  |
| MT799526 Pangolin coronavirus isolate cDNA31                                     | . . . . . T - . . . . .                         |  |
| MW251308 Bat coronavirus RacCS203                                                | . . . . . T - . . . . . S . . . . .             |  |
| MW719567 Sarbecovirus RhGB01                                                     | . . . . . A . . . . . S I . . . . . E . . . . . |  |
| MZ081376 Betacoronavirus sp RmYN05 strain bat/Yunnan/RmYN05/2020                 | . . . . . T - . . . . . R . . . . .             |  |
| MZ081378 Betacoronavirus sp RmYN08 strain bat/Yunnan/RmYN08/2020                 | . . . . . T - . . . . . R . . . . .             |  |
| MZ081380 Betacoronavirus sp RsYN04 strain bat/Yunnan/RsYN04/2020                 | . . . . . T - . . . . . R . . . . .             |  |
| MZ190137 Bat SARS-like coronavirus Khosta-1 strain BtCoV/Khosta-1/Rh/Russia/2020 | . . . . . T S . . . . .                         |  |
| MZ190138 Bat SARS-like coronavirus Khosta-2 strain BtCoV/Khosta-2/Rh/Russia/2020 | . . . . . T . . . . . S A . . . . .             |  |
| OL674074 SARS-related coronavirus isolate Rs7896                                 | . . . . . T - . . . . . R . . . . .             |  |
| OL674075 SARS-related coronavirus isolate Rs7905                                 | . . . . . T - . . . . . R . . . . .             |  |
| OL674076 SARS-related coronavirus isolate Rs7907                                 | . . . . . T - . . . . . R . . . . .             |  |
| OL674077 SARS-related coronavirus isolate Ra7909                                 | . . . . . T - . . . . . R . . . . .             |  |
| OL674078 SARS-related coronavirus isolate Rs7921                                 | . . . . . T - . . . . . R . . . . .             |  |
| OL674079 SARS-related coronavirus isolate Rs7924                                 | . . . . . T - . . . . . R . . . . .             |  |
| OL674080 SARS-related coronavirus isolate Rs7931                                 | . . . . . T - . . . . . R . . . . .             |  |
| OL674081 SARS-related coronavirus isolate Rs7952                                 | . . . . . T - . . . . . R . . . . .             |  |

**Supplementary Fig. S11 Alignment of the sequences around residue 372 of S proteins of bat SC2r-CoVs.**

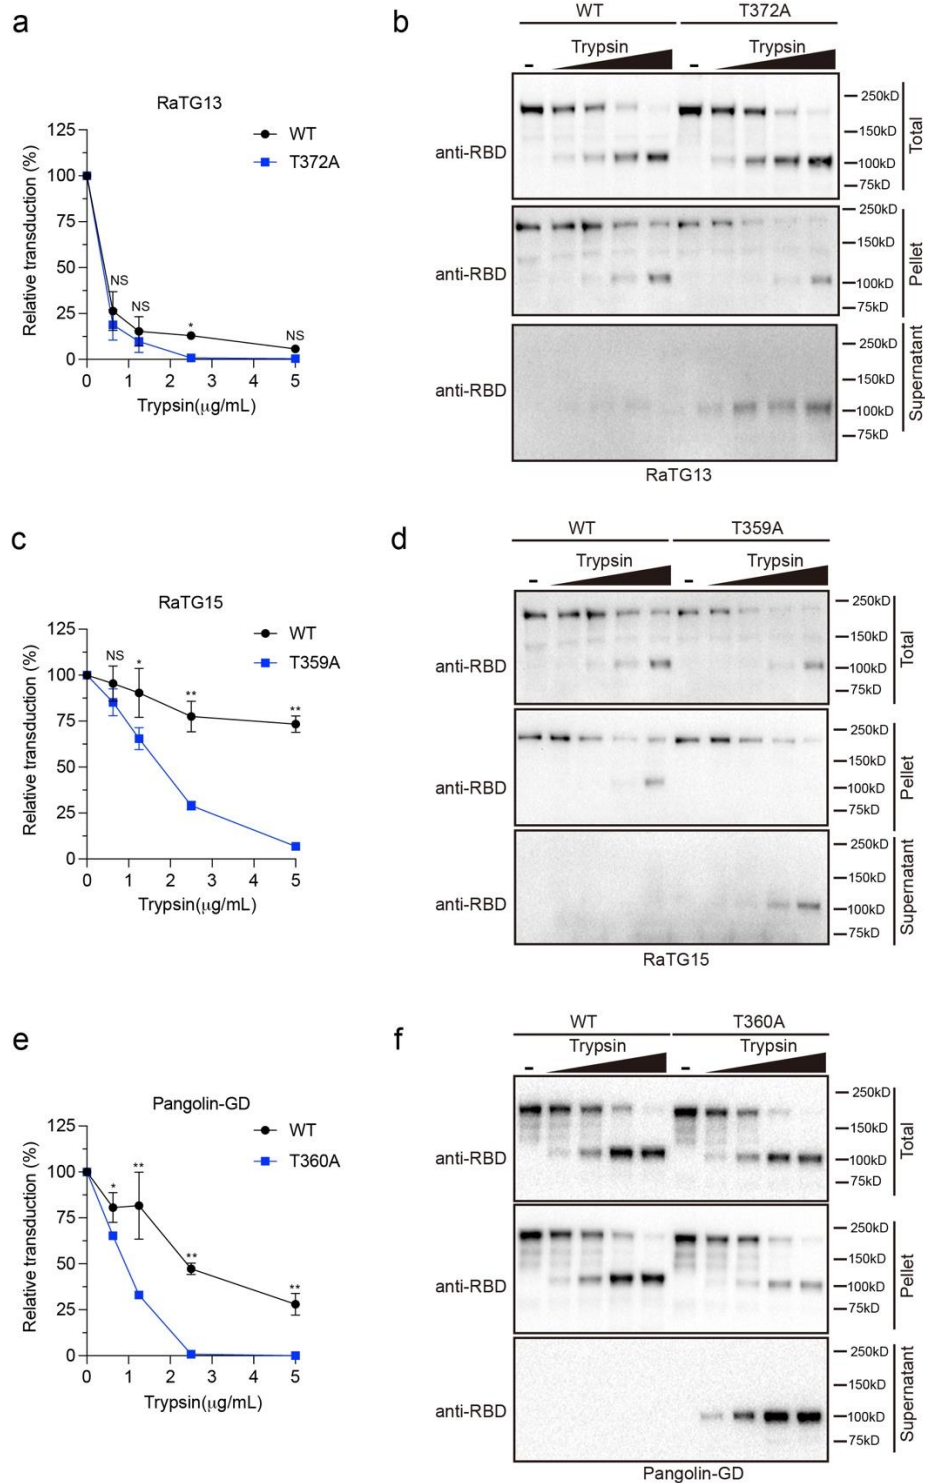

**Supplementary Fig. S12 Proteolytic stability of SARS-CoV-2 like bat coronaviruses.** (a, c, and e). Transduction of 293/hACE2 cells by SARS-CoV-2-like coronavirus RaTG13 S (a), RaTG15 S (c), Pangolin-GD S (e) wild-type and mutant pseudovirions. SARS-CoV-like S pseudovirions were first treated with serial dilutions of trypsin (2-fold dilution starting at 5 µg/mL) at pH 5.5 for 10 min. After neutralization with trypsin inhibitor, pseudovirions were used to transduce 293/hACE2 at pH 7.4. (b, d, and f). Detection of S proteins in RaTG13 S (b), RaTG15 S (d), Pangolin-GD S (f) wild-type and mutant pseudovirions-pretreated with serial



dilutions of trypsin (2-fold dilution starting at 5 $\mu$ g/mL) at pH 5.5 for 10 min by Western blot analysis. Trypsin-treated pseudovirions were first centrifuged to separate the supernatants and pellets, and the S1 subunit in total, supernatants and pellets of pseudovirions were then detected by Western blot analysis using rabbit polyclonal anti-SARS-CoV-2 Spike RBD antibody.

Data are represented as mean  $\pm$  standard deviation (SD) from at least triplicates. p values in (a, c and e) are calculated by unpaired two-sided Student's t test. \*p < 0.05; \*\*p < 0.01; and ns, p > 0.05.

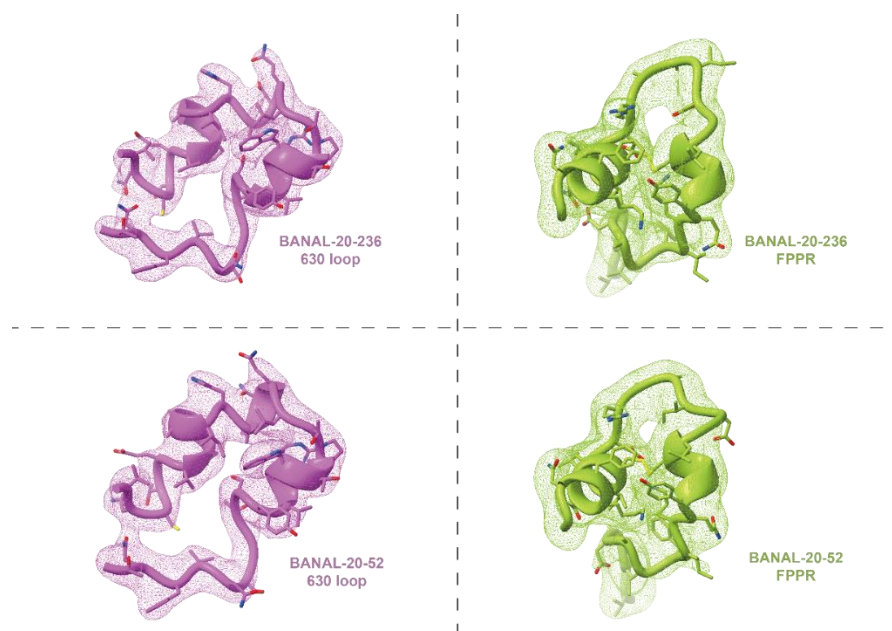

**Supplementary Fig. S13 The EM map density of 630 loop and FPPR in BANAL-20-23 and BANAL-20-52 Spike.** The atomic structures of 630 loop and FPPR are shown in magenta and green, respectively. The EM map densities of 630 loop and FPPR are represented by magenta and green meshes.

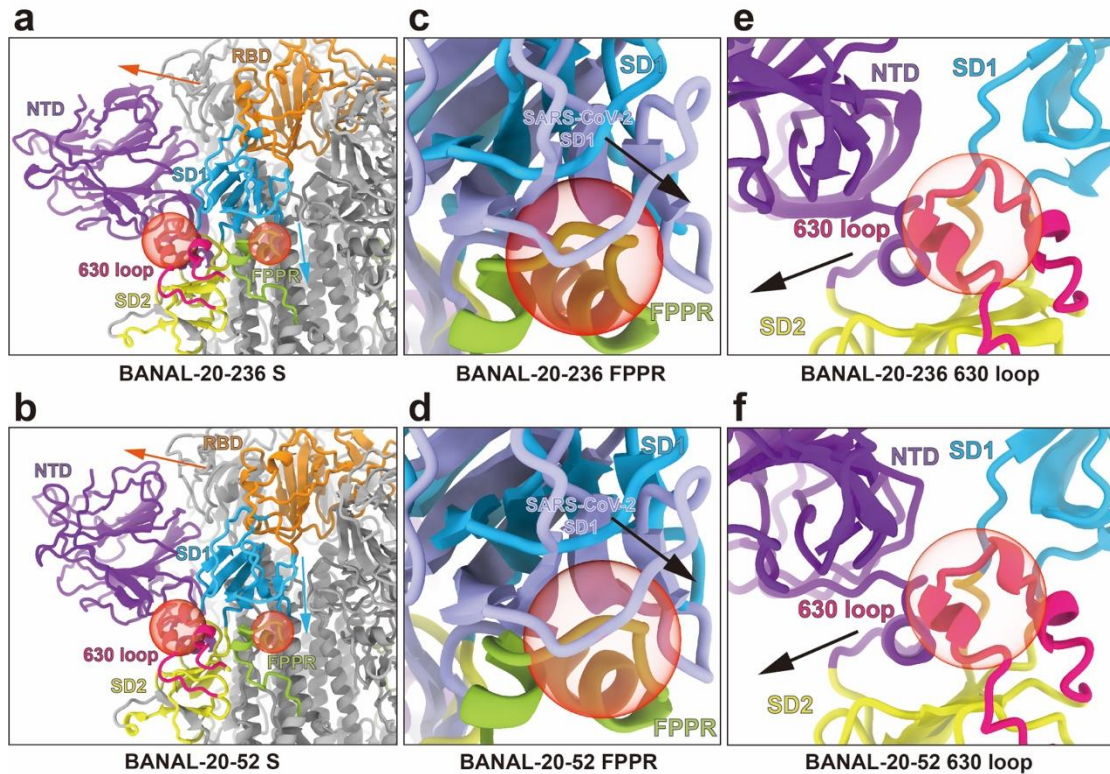

**Supplementary Fig. S14 Effect of 630 Loop and FPPR on conformation of BANAL-20-236 and BANAL-20-52 S proteins.** The RBDs of the BANAL-20-236 and BANAL-20-52 Spike are colored in orange, the SD1s are colored in blue, the NTD regions are colored in purple, the SD2 regions are colored in yellow, the FPPRs are colored in green, the 630 loops are colored in red and the red transparent sphere indicates where steric-hindrance effect might occur.

(a and b) The orange arrow indicates the change in the relative position of the raised RBD in the SARS-CoV-2 wild-type Spike trimer (PDB ID:6VYB) relative to RBDs of the two bat coronaviruses, and the blue arrow indicates the change in the relative position of SD1.

(c and d) The SD1 of SARS-CoV-2 one up formed Spike (PDB ID: 6VYB), which is superposed to the two bat coronavirus Spike, is colored orchid. The black arrow shows the relative position change of SARS-CoV-2 SD1 and two bat coronaviruses SD1.

(e and f) The black arrow indicates the relative position change of the 630 Loop of SARS-CoV-2 S protein (PDB ID: 6VYB) and the 630 loop of the two bat coronaviruses.

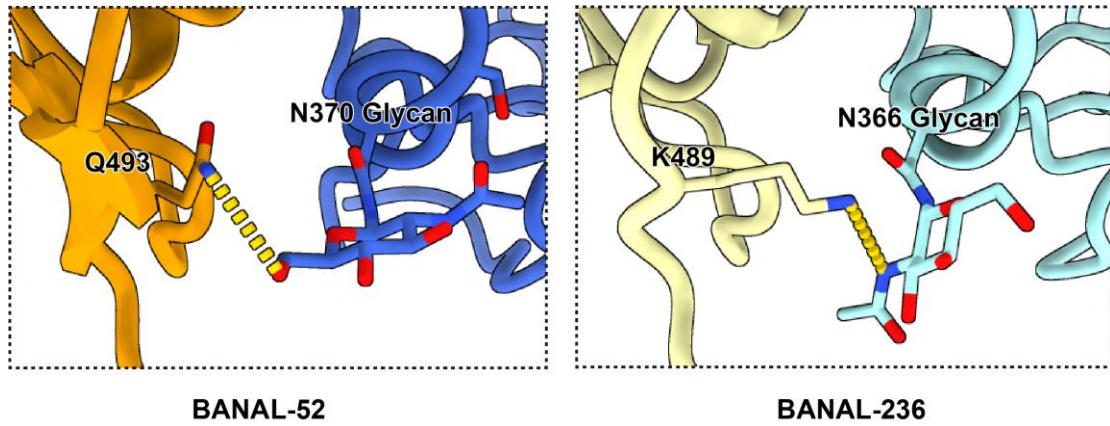

**Supplementary Fig. S15 Detailed interaction between N370 glycan and Q493 from the adjacent monomer.**

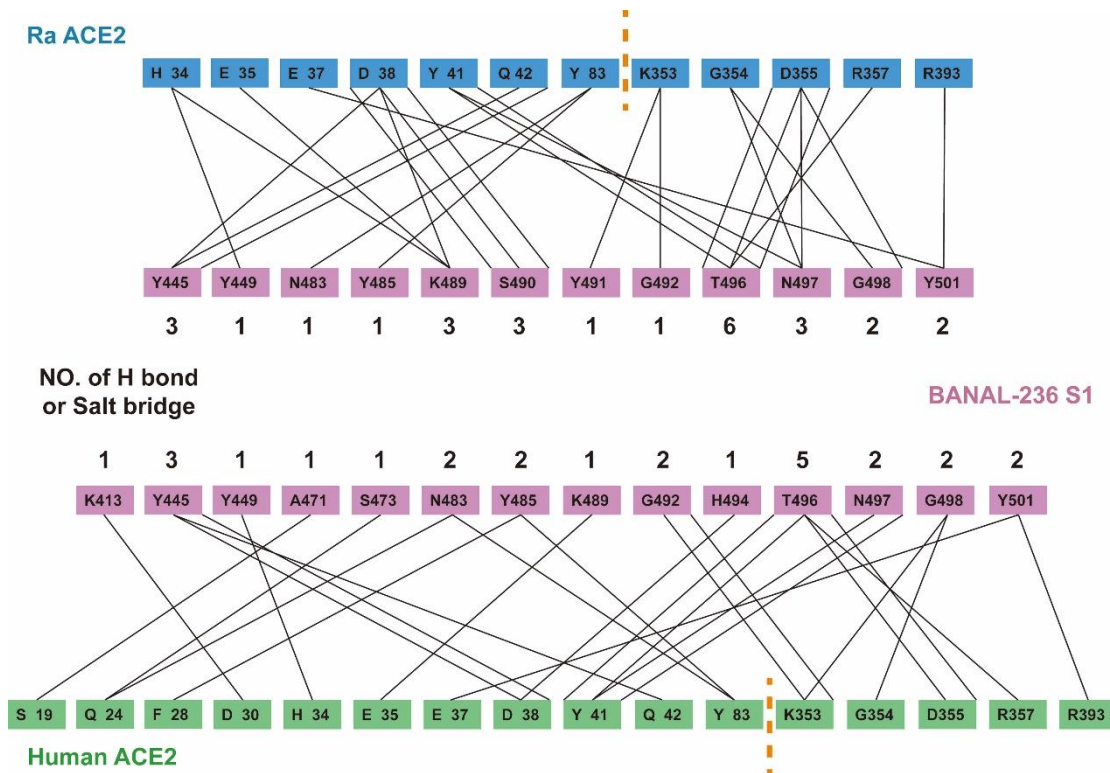

**Supplementary Fig. S16 Comparison of hydrogen bond and salt bridge interaction networks between BANAL-20-236 S1/R. *affinis* ACE2 complex and BANAL-20-236 RBD /hACE2 complex.** The purple boxes indicate the amino acid residues of BANAL-20-236 S1, the blue boxes indicate the amino acid residues of *R. affinis* ACE2, and the green boxes indicate the amino acid residues of human ACE2. The solid black and red lines show hydrogen bonds and salt bridges formed between indicated amino acid residues. The numbers in bold black below or above purple boxes indicate the number of hydrogen bonds and salt bridges formed by the corresponding amino acid residues. The orange dashed line divides the amino acid residues of ACE2, and the residues at both ends of the dashed line belong to different secondary structures.

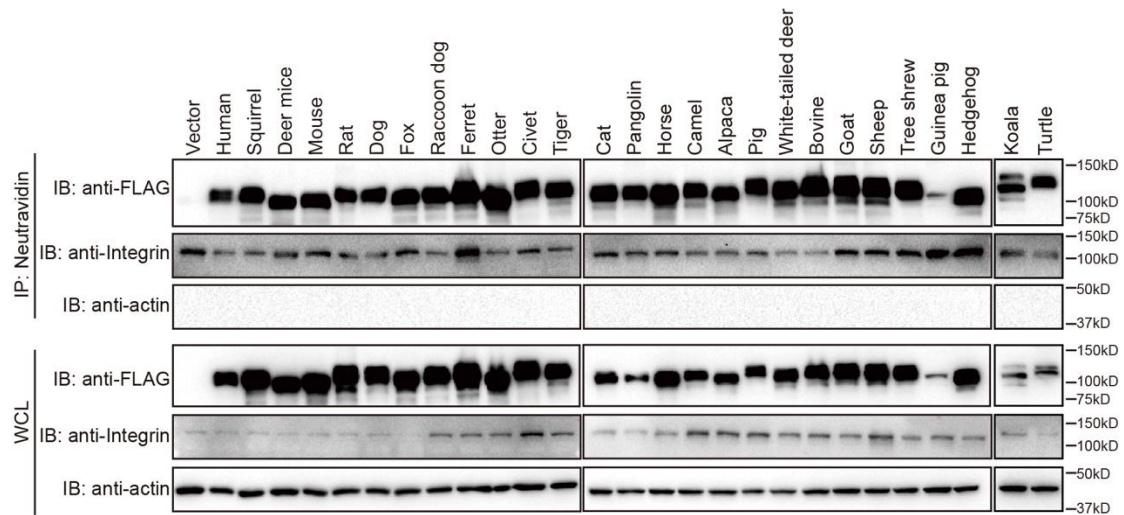

**Supplementary Fig. S17 Cell surface expression of different bat ACE2 orthologs.**

Detection of different animal ACE2 proteins on cell surface by cell surface protein biotinylation assay. HEK293 cells transiently overexpressing different bat species ACE2 proteins were labeled with EZ-link Sulfo-NHS-LC-LC-biotin on ice, and lysed with RIPA buffer. Biotinylated proteins were enriched with NeutrAvidin beads and analyzed by Western blotting using mouse monoclonal anti-FLAG M2 antibody. Integrin beta chain and  $\beta$ -actin were used as loading controls. WCL, whole cell lysate.

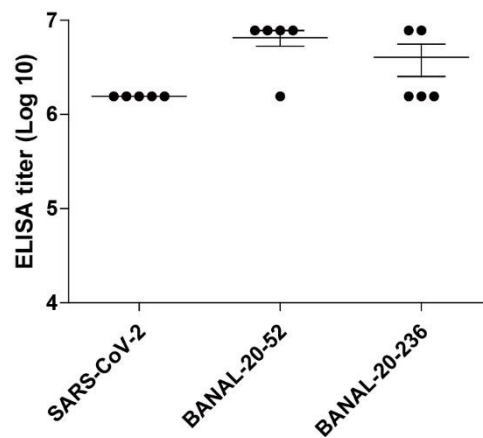

**Supplementary Fig. S18 Detection of RBD-specific IgG antibodies of sera from S trimer-immunized mice by ELISA.** Sera from SARS-CoV-2 S trimer, BANAL-20-52 S trimer or BANAL-20-236 S trimer-immunized mice were evaluated for their respective RBD-specific IgG antibodies by ELISA.

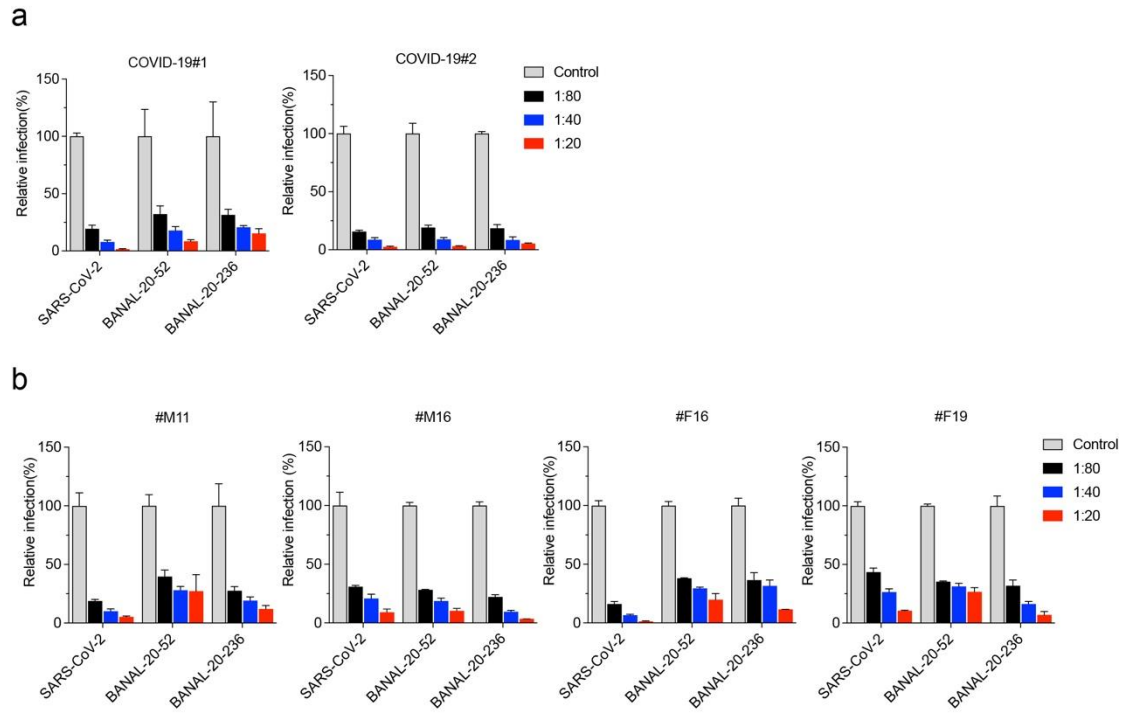

**Supplementary Fig. S19 Cross-neutralization activities of human sera against BANAL-20-52 S and BANAL-20-236 S pseudovirions. (a and b). Neutralization titers of sera from recovered COVID-19 patients (a) and COVID-19 vaccine recipients (b) against SARS-CoV-2 S, BANAL-20-52 S, and BANAL-20-236 S pseudovirions.**

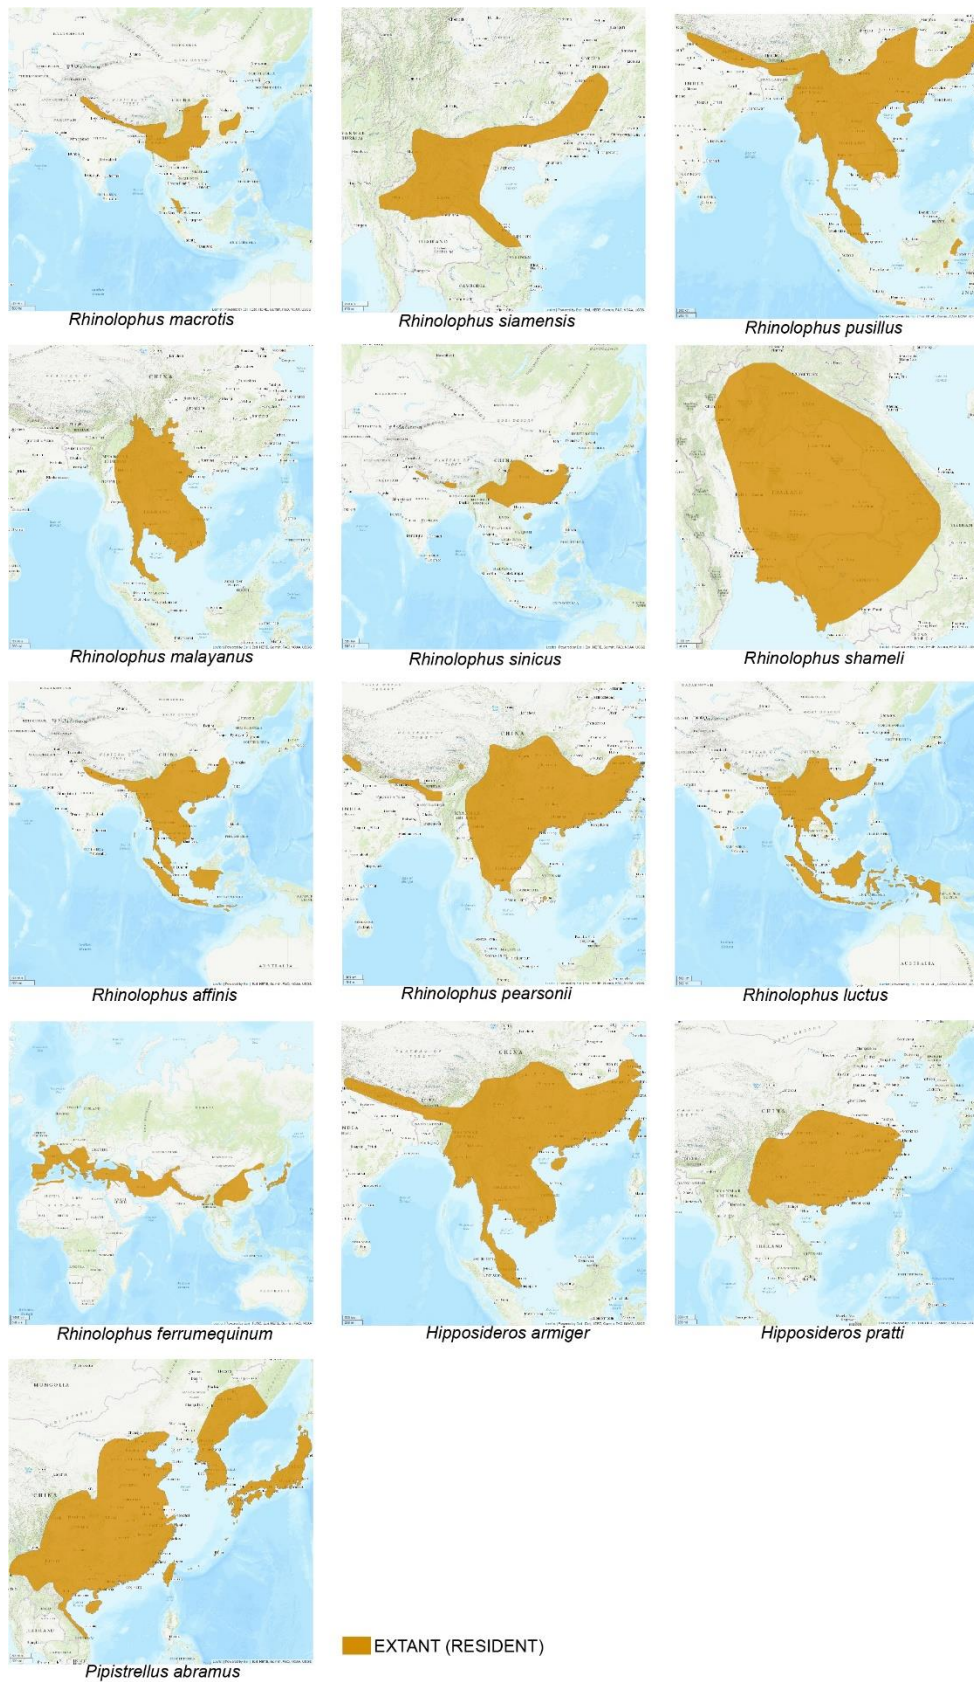

**Supplementary Fig. S20 Geographic distribution of 13 bat species.**  
 (<https://www.iucnredlist.org/>)

**Supplementary Table S1. The detailed interactions for BANAL-52 NTD (distance < 4 Å)**

| NTD of Chain A | Chain A                        | Chain B                   | Chain C                   |
|----------------|--------------------------------|---------------------------|---------------------------|
| K41            |                                |                           | L518                      |
| F43            |                                |                           | F562, Q563                |
| L50            |                                | L750                      |                           |
| Q52            |                                | T743, S746, N747,<br>L750 |                           |
| K113           |                                |                           | S469                      |
| Q115           |                                |                           | I468                      |
| E132           |                                |                           | I468                      |
| N165           |                                |                           | I468                      |
| N165 Glycan    |                                |                           | Y351                      |
| T167           |                                |                           | R466                      |
| D198           |                                |                           | P463, F464                |
| G199           |                                |                           | P463, F464                |
| Y200           |                                |                           | F464, R355, Y396          |
| P230           |                                |                           | R355, Y396                |
| I231           |                                |                           | R466                      |
| G232           |                                |                           | E465, F464, R466          |
| N234           |                                |                           | E465                      |
| N234 Glycan    |                                |                           | E465, R457, S459,<br>K468 |
| R273           | Q321                           |                           |                           |
| N282           |                                |                           | L560                      |
| C291           | F318                           |                           |                           |
| S292           | F318, T630, W633               |                           |                           |
| L293           | T630, T632, W633               |                           |                           |
| D294           | T632, W633                     |                           |                           |
| P295           | V597, V610, W633,<br>Y636      |                           |                           |
| E298           | T315, S316, F318,<br>R319 W633 |                           |                           |
| T299           | T315, Y313, V597               |                           |                           |
| C301           | F318                           |                           |                           |
| T302           | T315, S316                     |                           |                           |
| L303           | Y313                           |                           |                           |
| K304           |                                | T757                      |                           |

**Supplementary Table S2. The detailed interactions for BANAL-236 NTD (distance < 4 Å)**

| NTD of Chain A | Chain A                         | Chain B                   | Chain C                         |
|----------------|---------------------------------|---------------------------|---------------------------------|
| T42            |                                 |                           | L514                            |
| F44            |                                 |                           | N515, Q559                      |
| L51            |                                 | L746                      |                                 |
| Q53            |                                 | T739, S742, N743,<br>L746 |                                 |
| T113           |                                 |                           | S465, E467                      |
| Q115           |                                 |                           | I464                            |
| T166           |                                 |                           | R462                            |
| D197           |                                 |                           | P459, F460                      |
| G198           |                                 |                           | P459, F460                      |
| Y199           |                                 |                           | R351, Y392, F460                |
| P229           |                                 |                           | R351, Y392                      |
| G231           |                                 |                           | F460, E461, R462                |
| N233 Glycan    |                                 |                           | R453, S455, K454,<br>K458, E461 |
| P268           | Q317                            |                           |                                 |
| R269           | Q317                            |                           |                                 |
| T270           | F314                            |                           |                                 |
| N278           |                                 |                           | L556                            |
| C287           | F314                            |                           |                                 |
| S288           | F314, Q317, T626,<br>W629       |                           |                                 |
| L289           | T626, T628, W629                |                           |                                 |
| D290           | T628, W629,                     |                           |                                 |
| P291           | V593, V604, V606,<br>W629, Y632 |                           |                                 |
| L292           | T595, N602, V604                |                           |                                 |
| E294           | T311, F314, R315,<br>W629       |                           |                                 |
| A295           | T311                            |                           |                                 |
| K296           | T598                            |                           |                                 |
| C297           | F314                            |                           |                                 |
| T298           | Q310, T311, S312                |                           |                                 |
| K300           |                                 | S750                      |                                 |



**Supplementary Table S3. The detailed interactions between the NTD and neighbouring domains of the S protein**

| S52-NTD (chain A) |               |                    |               | S236-NTD (chain A) |               |                   |               |
|-------------------|---------------|--------------------|---------------|--------------------|---------------|-------------------|---------------|
| self: 34 contacts |               | cross: 37 contacts |               | cross: 30 contacts |               | self: 31 contacts |               |
| S52:chain B       | S52:chain C   | S236:chain B       | S236:chain C  | S52:chain B        | S52:chain C   | S236:chain B      | S236:chain C  |
| 6                 | 28            | 6                  | 31            | 6                  | 24            | 6                 | 25            |
| 50L.....L750      | 41K.....L518  | 50L.....L746       | 41K.....L514  | 51L.....L750       | 42T.....E516  | 51L.....L746      | 42T.....L514  |
| 52Q.....L750      | 43F.....F562  | 52Q.....L746       | 43F.....N515  | 53Q.....L750       | 42T.....L518  | 53Q.....L746      | 44F.....N515  |
| 52Q.....N747      | 43F.....Q563  | 52Q.....N743       | 43F.....Q559  | 53Q.....N747       | 44F.....N519  | 53Q.....N743      | 44F.....Q559  |
| 52Q.....S746      | 113K.....S469 | 52Q.....S742       | 113K.....E467 | 53Q.....S746       | 44F.....Q563  | 53Q.....S742      | 113T.....E467 |
| 52Q.....T743      | 115Q.....I468 | 52Q.....T739       | 113K.....S465 | 53Q.....T743       | 44F.....R567  | 53Q.....T739      | 113T.....S465 |
| 304K.....T757     | 132E.....I468 | 304K.....T753      | 115Q.....I464 | 300K.....S754      | 115Q.....I468 | 300K.....S750     | 115Q.....I464 |
|                   | 165N.....I468 |                    | 132E.....S465 |                    | 166T.....R466 |                   | 166T.....R462 |
|                   | 167T.....R466 |                    | 198D.....F460 |                    | 197D.....F464 |                   | 197D.....F460 |
|                   | 198D.....F464 |                    | 198D.....P422 |                    | 197D.....P463 |                   | 197D.....P459 |
|                   | 198D.....P463 |                    | 198D.....P459 |                    | 198G.....F464 |                   | 198G.....F460 |
|                   | 199G.....F464 |                    | 199G.....E461 |                    | 198G.....P463 |                   | 198G.....P459 |
|                   | 199G.....P463 |                    | 199G.....F460 |                    | 199Y.....N394 |                   | 199Y.....R351 |
|                   | 200Y.....R355 |                    | 199G.....P459 |                    | 199Y.....R355 |                   | 199Y.....Y392 |
|                   | 200Y.....Y396 |                    | 200Y.....F460 |                    | 199Y.....Y396 |                   | 199Y.....F460 |
|                   | 200Y.....F464 |                    | 200Y.....R351 |                    | 229P.....R355 |                   | 229P.....R351 |
|                   | 230P.....R355 |                    | 200Y.....Y392 |                    | 229P.....Y396 |                   | 229P.....Y392 |
|                   | 230P.....Y396 |                    | 230P.....R351 |                    | 231G.....E465 |                   | 231G.....E461 |
|                   | 231L.....R466 |                    | 230P.....Y392 |                    | 231G.....F464 |                   | 231G.....F460 |
|                   | 232G.....E465 |                    | 231L.....R462 |                    | 231G.....R466 |                   | 231G.....R462 |
|                   | 232G.....F464 |                    | 232G.....E461 |                    | 278N.....L560 |                   | 278N.....L556 |

|  |                       |  |                       |  |                       |  |                       |
|--|-----------------------|--|-----------------------|--|-----------------------|--|-----------------------|
|  | 232G.....R466         |  | 232G.....F460         |  | 233N<br>glycan...E465 |  | 233N<br>glycan...R453 |
|  | 234N.....E465         |  | 232G.....R462         |  | 233N<br>glycan...R457 |  | 233N<br>glycan...S455 |
|  | 282N.....L560         |  | 233I.....E461         |  | 233N<br>glycan...S459 |  | 233N<br>glycan...K454 |
|  | 165N<br>glycan...Y351 |  | 233I.....R462         |  | 233N<br>glycan...K468 |  | 233N<br>glycan...K458 |
|  | 234N<br>glycan...E465 |  | 234N.....E461         |  |                       |  | 233N<br>glycan...E461 |
|  | 234N<br>glycan...R457 |  | 282N.....L556         |  |                       |  |                       |
|  | 234N<br>glycan...S459 |  | 234N<br>glycan...R453 |  |                       |  |                       |
|  | 234N<br>glycan...K468 |  | 234N<br>glycan...S455 |  |                       |  |                       |
|  |                       |  | 234N<br>glycan...K454 |  |                       |  |                       |
|  |                       |  | 234N<br>glycan...K458 |  |                       |  |                       |
|  |                       |  | 234N<br>glycan...E461 |  |                       |  |                       |

**Supplementary Table S4. Accession number list of bat and animal ACE2s**

| <b>Bat species</b>               | <b>Accession</b> |
|----------------------------------|------------------|
| <i>Rhinolophus macrotis</i>      | ADN93471.1       |
| <i>Rhinolophus siamensis</i>     | *Ref             |
| <i>Rhinolophus pusillus</i>      | ADN93477.1       |
| <i>Rhinolophus malayanus</i>     | *Ref             |
| <i>Rhinolophus sinicus</i> HB    | ADN93475         |
| <i>Rhinolophus sinicus</i> YN    | AGZ48803         |
| <i>Rhinolophus shameli</i>       | UBB59645         |
| <i>Rhinolophus affinis</i>       | QMQ39242.1       |
| <i>Rhinolophus pearsonii</i>     | QKE49996.1       |
| <i>Rhinolophus luctus</i>        | *Ref             |
| <i>Rhinolophus ferrumequinum</i> | XP_032963186.1   |
| <i>Hipposideros armiger</i>      | XP_019522954.1   |
| <i>Hipposideros pratti</i>       | QKE49995.1       |
| <i>Rhinolophus macrotis</i>      | ADN93471.1       |

  

| <b>Animal species</b> | <b>Accession</b> |
|-----------------------|------------------|
| Squirrel              | XP_026252505     |
| Deer mice             | XP_006973269.1   |
| Mouse                 | NP_001123985     |
| Rat                   | NP_001012006     |
| Dog                   | NP_001158732.1   |
| Fox                   | XP_025842512     |
| Raccoon dog           | ABW16956.1       |
| Ferret                | NP_001297119     |
| Otter                 | XP_032736029.1   |
| Civet                 | AAX63775         |
| Tigers                | XP_042830021.1   |
| Cat                   | AAX59005.1       |
| Pangolin              | XP_017505746     |
| Horse                 | XP_001490241.1   |
| Camel                 | XP_006194263     |
| Alpaca                | XP_006212709.1   |
| Pig                   | NP_001116542     |
| White-tailed deer     | XP_020768965.1   |
| Bovine                | NP_001019673.2   |
| Goat                  | NP_001277036.1   |
| Sheep                 | XP_011961657.1   |

|             |              |
|-------------|--------------|
| Tree shrews | QNV47311.1   |
| Guinea pig  | ACT66270     |
| Hedgehog    | XP_004710002 |
| Koala       | XP_020863153 |
| Turtle      | XP_006122891 |

---

\*Ref: The ACE sequences of *Rhinolophus siamensis*, *Rhinolophus malayanus*, and *Rhinolophus luctus* were obtained from the previous study (Wu et al., National Science Review, nwac213, 2022).

**Supplementary Table S5. Cryo-EM data Collection, refinement and validation statistic**

| Protein                                                 | BANAL-20-236 S-trimer | BANAL-20-52 S-trimer |
|---------------------------------------------------------|-----------------------|----------------------|
| <b>Data collection</b>                                  |                       |                      |
| Voltage (kV)                                            | 300                   | 300                  |
| Microscope                                              | FEI Titan Krios G2    | FEI Titan Krios G2   |
| Camera                                                  | K2 (Gatan)            | K2 (Gatan)           |
| Magnification (calibrated)                              | 130,000X              | 130,000X             |
| Electron exposure (e <sup>-</sup> /Å <sup>2</sup> )     | 60                    | 60                   |
| Frames rate                                             | 32                    | 32                   |
| Defocus range (μm)                                      | -1.4 to -2.2          | -1.4 to -2.2         |
| Pixel size (Å)                                          | 1.04                  | 1.04                 |
| <b>Overall map processing</b>                           |                       |                      |
| Micrographs used                                        | 3,337                 | 3125                 |
| Symmetry imposed                                        | C3                    | C3                   |
| Initial particle images                                 | 651,261               | 587,533              |
| Final particle images                                   | 235,303               | 179,587              |
| Resolution at 0.143 FSC of<br>masked reconstruction (Å) | 2.85                  | 3.52                 |
| Map sharpening B factor (Å <sup>2</sup> )               | -102.8                | -132.0               |
| <b>Local map refinement</b>                             |                       |                      |
| Initial model used (PDB code)                           | 6VXX                  | 6VXX                 |
| Refinement package                                      | Phenix v1.19          | Phenix v1.19         |
| <b>Model composition</b>                                |                       |                      |
| Non-hydrogen atoms                                      | 27,000                | 27,639               |
| Protein residues                                        | 3345                  | 3399                 |
| Ligands                                                 | NAG:69                | NAG:81               |

**Supplementary Table S6. Cryo-EM data Collection, refinement and validation statistic  
(continued)**

| Protein                          | BANAL-20-236 S-trimer | BANAL-20-52 S-trimer |
|----------------------------------|-----------------------|----------------------|
| <b>R.m.s. deviations</b>         |                       |                      |
| Bond lengths (Å)                 | 0.004                 | 0.003                |
| Bond angles (°)                  | 0.671                 | 0.619                |
| <b>B factors (Å<sup>2</sup>)</b> |                       |                      |
| Protein                          | 32.42                 | 77.42                |
| Ligands                          | 49.18                 | 77.07                |
| <b>Validation</b>                |                       |                      |
| MolProbity score                 | 2.11                  | 2.12                 |
| Clashscore                       | 12.97                 | 11.90                |
| Poor rotamers (%)                | 0.00                  | 0.00                 |
| <b>Ramachandran plot</b>         |                       |                      |
| Favored (%)                      | 92.00                 | 90.60                |
| Allowed (%)                      | 8.00                  | 9.40                 |
| Disallowed (%)                   | 0.00                  | 0.00                 |
| Cβ outliers (%)                  | 0.00                  | 0.00                 |
| CaBLAM outliers (%)              | 6.03                  | 6.85                 |

**Supplementary Table S7. Cryo-EM data Collection, refinement and validation statistic**

| Protein                                              | BANAL-20-236 S1 and <i>R. affinis</i> ACE2 |
|------------------------------------------------------|--------------------------------------------|
| <b>Data collection</b>                               |                                            |
| Voltage (kV)                                         | 300                                        |
| Microscope                                           | FEI Titan Krios                            |
| Camera                                               | K3 (Gatan)                                 |
| Magnification (calibrated)                           | 22,500X                                    |
| Electron exposure (e <sup>-</sup> /Å <sup>2</sup> )  | 60                                         |
| Frames rate                                          | 32                                         |
| Defocus range (μm)                                   | -1.4 to -2.2                               |
| Pixel size (Å)                                       | 1.07                                       |
| <b>Overall map processing</b>                        |                                            |
| Micrographs used                                     | 5,117                                      |
| Symmetry imposed                                     | C1                                         |
| Initial particle images                              | 1,994,838                                  |
| Final particle images                                | 156,892                                    |
| Resolution at 0.143 FSC of masked reconstruction (Å) | 3.87                                       |
| Map sharpening B factor (Å <sup>2</sup> )            | -128.6                                     |
| <b>Local map refinement</b>                          |                                            |
| Initial model used (PDB code)                        | 7R10                                       |
| Refinement package                                   | Phenix v1.19                               |
| <b>Model composition</b>                             |                                            |
| Non-hydrogen atoms                                   | 10,340                                     |
| Protein residues                                     | 1273                                       |
| Ligands                                              | NAG:9                                      |

**Supplementary Table S8. Cryo-EM data Collection, refinement and validation statistic  
(continued)**

| Protein                          | BANAL-20-236 S1 and <i>R. affinis</i> ACE2 |
|----------------------------------|--------------------------------------------|
| <b>R.m.s. deviations</b>         |                                            |
| Bond lengths (Å)                 | 0.006                                      |
| Bond angles (°)                  | 1.269                                      |
| <b>B factors (Å<sup>2</sup>)</b> |                                            |
| Protein                          | 134.8                                      |
| Ligands                          | 118.34                                     |
| <b>Validation</b>                |                                            |
| MolProbity score                 | 2.15                                       |
| Clashscore                       | 13.00                                      |
| Poor rotamers (%)                | 0.00                                       |
| <b>Ramachandran plot</b>         |                                            |
| Favored (%)                      | 90.78                                      |
| Allowed (%)                      | 9.22                                       |
| Disallowed (%)                   | 0.00                                       |
| Cβ outliers (%)                  | 0.00                                       |
| CaBLAM outliers (%)              | 5.69                                       |



## KEY RESOURCES TABLE

| REAGENT OR RESOURCE                                             | SOURCE                                       | IDENTIFIER       |
|-----------------------------------------------------------------|----------------------------------------------|------------------|
| <b>Antibodies</b>                                               |                                              |                  |
| Mouse monoclonal anti-FLAG M2 antibody                          | Sigma                                        | Cat: F1804-5MG   |
| Mouse monoclonal anti- $\beta$ -actin antibody                  | Sigma                                        | Cat: A5441-2ML   |
| Rabbit polyclonal anti-HIV-1 Gag-p24 antibody                   | Sino Biological Inc. (Beijing, China)        | Cat: 11695-RP01  |
| Rabbit polyclonal anti-SARS-CoV-2 S2 antibody                   | Sino Biological Inc. (Beijing, China)        | Cat: 40590-T62   |
| Rabbit polyclonal anti-SARS-CoV-2 Spike RBD antibody            | Sino Biological Inc. (Beijing, China)        | Cat:40592-T62    |
| Rabbit polyclonal anti-integrin $\beta$ 1 antibody              | Proteintech (Wuhan, China)                   | Cat: 34971       |
| Mouse anti-strep-tag II antibody                                | Bioss Biotechnology, (Beijing, China)        | Cat: bsm-33016M  |
| HRP-conjugated donkey anti-rabbit IgG                           | Jackson ImmunoResearch (West Grove, PA, USA) | Cat: 711-035-152 |
| HRP-conjugated goat anti-mouse IgG                              | Jackson ImmunoResearch (West Grove, PA, USA) | Cat: 115-035-146 |
| <b>Bacterial and virus strains</b>                              |                                              |                  |
| Trelief 5 $\alpha$ chemically competent Cell                    | TSINGKE Biotechnology Co., Ltd               | Cat: TSC-C01     |
| <b>Biological samples</b>                                       |                                              |                  |
| Human COVID-19 convalescent plasmas                             | (Ou et al., 2020)                            | N/A              |
| Sera from persons immunized with inactivated SARS-CoV-2 vaccine | This study                                   | N/A              |
| Sera from recombinant spike-immunized mice                      | This study                                   | N/A              |
| <b>Chemicals, peptides, and recombinant proteins</b>            |                                              |                  |
| E64D                                                            | Med Chem Express (New Jersey, USA)           | Cat: HY-100229   |
| Bafilomycin A1                                                  | Med Chem Express (New Jersey, USA)           | Cat: HY-100558   |
| Apilimod                                                        | Med Chem Express (New Jersey, USA)           | Cat: HY-14644    |
| Camostat                                                        | Selleck Chemicals (Texas, USA)               | Cat: S2874       |
| EZ-linked Sulfo-NHS-LC-LC-biotin                                | Thermo Pierce                                | Cat: #21331      |
| SARS-CoV-2 S-trimer                                             | Sino Biological Inc. (Beijing, China)        | Cat: 40589-V08H4 |
| BANAL-20-52 S-trimer (K982P/V983P)                              | This study                                   | N/A              |
| BANAL-20-236 S-trimer (K978P/V979P)                             | This study                                   | N/A              |
| Soluble <i>R. affinis</i> ACE2                                  | This study                                   | N/A              |
| SARS-CoV-2 RBD                                                  | This study                                   | N/A              |
| BANAL-20-52 RBD                                                 | This study                                   | N/A              |

|                                                                         |                                                              |               |
|-------------------------------------------------------------------------|--------------------------------------------------------------|---------------|
| BANAL-20-236 RBD                                                        | This study                                                   | N/A           |
| Critical commercial assays                                              |                                                              |               |
| Steady-Glo® Luciferase Assay System                                     | Invitrogen                                                   | Cat: E2510    |
| Experimental models: Cell lines                                         |                                                              |               |
| HEK293T                                                                 | ATCC                                                         | Cat: CRL-3216 |
| HEK293                                                                  | ATCC                                                         | Cat: CRL-1573 |
| HEK293/hACE2                                                            | Laboratory of Zhaohui Qian                                   | N/A           |
| Calu3                                                                   | ATCC                                                         | Cat: HTB-55   |
| Expi293F                                                                | Gibco                                                        | Cat: A14527   |
| Experimental models: Organisms/strains                                  |                                                              |               |
| BALB/c mice                                                             | Beijing Vital River Laboratory<br>Animal Technology Co., Ltd | N/A           |
| Oligonucleotides                                                        |                                                              |               |
| SARS-CoV-2-S-Q498H-F:<br>CTACGGCTTCCACCCAACCAACGGC                      | Ruibo Xingke Biotech (Beijing, China)                        | N/A           |
| SARS-CoV-2-S-Q498H-R:<br>GCCGTTGGTTGGGTGGAAGCCGTAG                      | Ruibo Xingke Biotech (Beijing, China)                        | N/A           |
| BANAL-20-52-S-T372A-F:<br>CTGTGCTGTATAACAGCGCCTCTTTCAG<br>CACATTCAAG    | Ruibo Xingke Biotech (Beijing, China)                        | N/A           |
| BANAL-20-52-S-T372A-R:<br>CTTGAATGTGCTGAAAGAGGCGCTGTTA<br>TACAGCACAG    | Ruibo Xingke Biotech (Beijing, China)                        | N/A           |
| BANAL-20-52-S-Q493K-F:<br>GTTACTTTCCTCTGAAAAGCTACGGCTT<br>CC            | Ruibo Xingke Biotech (Beijing, China)                        | N/A           |
| BANAL-20-52-S-Q493K-R:<br>GGAAGCCGTAGCTTTTCAGAGGAAAGT<br>AAC            | Ruibo Xingke Biotech (Beijing, China)                        | N/A           |
| BANAL-20-52-S-H498Q-F:<br>CTACGGCTTCCAACCTACCAACGGC                     | Ruibo Xingke Biotech (Beijing, China)                        | N/A           |
| BANAL-20-52-S-H498Q-R:<br>GCCGTTGGTAGGTTGGAAGCCGTAG                     | Ruibo Xingke Biotech (Beijing, China)                        | N/A           |
| BANAL-20-236-S-T368A-F:<br>CAGCGTGCTTTATAACAGCGCCAGCTTC<br>AGCACATTTAAG | Ruibo Xingke Biotech (Beijing, China)                        | N/A           |
| BANAL-20-236-S-T368A-R:<br>CTTAAATGTGCTGAAGCTGGCGCTGTTA<br>TAAAGCACGCTG | Ruibo Xingke Biotech (Beijing, China)                        | N/A           |
| BANAL-20-236-S-K489Q-F:<br>GCTACTTCCCCCTGCAGAGCTACGGCTT<br>TC           | Ruibo Xingke Biotech (Beijing, China)                        | N/A           |

|                                                                                     |                                          |     |
|-------------------------------------------------------------------------------------|------------------------------------------|-----|
| BANAL-20-236-S-K489Q-R:<br>GAAAGCCGTAGCTCTGCAGGGGGAAGT<br>AGC                       | Ruibo Xingke Biotech (Beijing,<br>China) | N/A |
| BANAL-20-52-S-2P(K982P/V983P)-F:<br>CTGAGCAGACTGGATCCCCCTGAGGCCG<br>AGGTGCAG        | Ruibo Xingke Biotech (Beijing,<br>China) | N/A |
| BANAL-20-52-S-2P(K982P/V983P)-R:<br>CTGCACCTCGGCCTCAGGGGATCCAGT<br>CTGCTCAG         | Ruibo Xingke Biotech (Beijing,<br>China) | N/A |
| BANAL-20-236-S-2P(K978P/V979P)-F:<br>CCTGAGCAGACTGGATCCACCCGAAGC<br>CGAGGTGCAG      | Ruibo Xingke Biotech (Beijing,<br>China) | N/A |
| BANAL-20-236-S-2P(K978P/V979P)-R:<br>CTGCACCTCGGCTTCGGGTGGATCCAGT<br>CTGCTCAGG      | Ruibo Xingke Biotech (Beijing,<br>China) | N/A |
| BANAL-20-52-S-ins-furin-F:<br>CTGCACCTCGGCTTCGGGTGGATCCAGT<br>CTGCTCAGG             | Ruibo Xingke Biotech (Beijing,<br>China) | N/A |
| BANAL-20-52-S-ins-furin-R:<br>GCGATGATGCTCTGAGATGCTCTCCTTG<br>GGCTGTTGGTTTGGGTCTG   | Ruibo Xingke Biotech (Beijing,<br>China) | N/A |
| BANAL-20-236-S-ins-furin-F:<br>CAGACACAGACCAATCCCCAAGGAGA<br>GCAAGATCCGTGGCCAGCCAG  | Ruibo Xingke Biotech (Beijing,<br>China) | N/A |
| BANAL-20-236-S-ins-furin-R:<br>CTGGCTGGCCACGGATCTTGCTCTCCTT<br>GGGGAATTGGTCTGTGTCTG | Ruibo Xingke Biotech (Beijing,<br>China) | N/A |
| SARS-CoV-2-S-del-furin-F:<br>CCAGACAAACTCCCCACGGTCTGTGGCA<br>AGC                    | Ruibo Xingke Biotech (Beijing,<br>China) | N/A |
| SARS-CoV-2-S-del-furin-R:<br>GCTTGCCACAGACCGTGGGGAGTTTGTC<br>TGG                    | Ruibo Xingke Biotech (Beijing,<br>China) | N/A |
| Pangolin-GD-S-T368A-F:<br>CGTGCTGTACAACAGCGCCAGCTTCAGC<br>ACATTC                    | Ruibo Xingke Biotech (Beijing,<br>China) | N/A |
| Pangolin-GD-S-T368A-R:<br>GAATGTGCTGAAGCTGGCGCTGTTGTAC<br>AGCACG                    | Ruibo Xingke Biotech (Beijing,<br>China) | N/A |
| RaTG15-S-T359A-F:<br>GCTCTACAACAGCGCCTTTTCAGTACC                                    | Ruibo Xingke Biotech (Beijing,<br>China) | N/A |
| RaTG15-S-T359A-R:<br>GGTACTGAAAGAGGCGCTGTTGTAGAG<br>C                               | Ruibo Xingke Biotech (Beijing,<br>China) | N/A |

|                                                   |                                       |                                                                             |
|---------------------------------------------------|---------------------------------------|-----------------------------------------------------------------------------|
| RaTG13-S-T372A-F:<br>GCTGTATAATAGCGCCAGCTTCAGCACC | Ruibo Xingke Biotech (Beijing, China) | N/A                                                                         |
| RaTG13-S-T372A-R:<br>GGTGCTGAAGCTGGCGCTATTATACAGC | Ruibo Xingke Biotech (Beijing, China) | N/A                                                                         |
| Recombinant DNA                                   |                                       |                                                                             |
| pcDNA3.1-SARS-CoV-S-delta19                       | Laboratory of Zhaohui Qian            | N/A                                                                         |
| p3xFLAG-CMV14-SARS-CoV-2-S-delta19                | Laboratory of Zhaohui Qian            | N/A                                                                         |
| p3xFLAG-CMV14-BANAL-20-52-S-delta19               | This study                            | GenBank: MZ937000                                                           |
| p3xFLAG-CMV14-BANAL-20-236-S-delta19              | This study                            | GenBank: MZ937003                                                           |
| p3xFLAG-CMV14-Pangolin-GD-S-delta19               | This study                            | GenBank: MT799521.1                                                         |
| p3xFLAG-CMV14-RaTG13-S-delta19                    | (Li et al.,2021)                      | GISAID accession number:<br>EPI_ISL_6640919                                 |
| p3xFLAG-CMV14-Omicron-S-delta19                   | This study                            | GISAID accession number:<br>EPI_ISL_6640919                                 |
| p3xFLAG-CMV14-Delta-S-delta19                     | This study                            | GISAID accession number:<br>EPI_ISL_3940074                                 |
| p3xFLAG-CMV14-RaTG15-S-delta19                    | This study                            | National Genomics Data Center of China accession number:<br>GWHBAUP01000000 |
| p3xFLAG-CMV14-SARS-CoV-2-S-Q498H                  | This study                            | N/A                                                                         |
| p3xFLAG-CMV14- BANAL-20-52-S-T472A                | This study                            | N/A                                                                         |
| p3xFLAG-CMV14-BANAL-20-52-S-Q493K                 | This study                            | N/A                                                                         |
| p3xFLAG-CMV14-BANAL-20-52-S-H498Q                 | This study                            | N/A                                                                         |
| p3xFLAG-CMV14-BANAL-20-236-S-T368A                | This study                            | N/A                                                                         |
| p3xFLAG-CMV14-BANAL-20-236-S-K489Q                | This study                            | N/A                                                                         |
| p3xFLAG-CMV14-RaTG13-S-T372A                      | This study                            | N/A                                                                         |
| p3xFLAG-CMV14-RaTG15-S-T359A                      | This study                            | N/A                                                                         |
| p3xFLAG-CMV14-Pangolin-GD-S-T368A                 | This study                            | N/A                                                                         |
| p3xFLAG-CMV14-SARS-CoV-2-S-Del-furin              | This study                            | N/A                                                                         |
| p3xFLAG-CMV14-BANAL-20-52-S-Ins-furin             | This study                            | N/A                                                                         |
| p3xFLAG-CMV14-BANAL-20-236-S-Ins-furin            | This study                            | N/A                                                                         |
| pcDNA3.1-BANAL-20-52-S-trimer (2P)                | This study                            | N/A                                                                         |
| pcDNA3.1-BANAL-20-236-S-trimer (2P)               | This study                            | N/A                                                                         |
| pcDNA3.1-SARS-CoV-2-RBD                           | This study                            | N/A                                                                         |
| pcDNA3.1-BANAL-20-52-RBD                          | This study                            | N/A                                                                         |
| pcDNA3.1-BANAL-20-236-RBD                         | This study                            | N/A                                                                         |
| pcDNA3.1-sRaACE2                                  | This study                            | N/A                                                                         |
| psPAX2                                            | Addgene                               | Cat: 12260                                                                  |
| pLenti-GFP                                        | A gift of Fang Li (Duke University)   | N/A                                                                         |

|                                                                |                   |     |
|----------------------------------------------------------------|-------------------|-----|
| p3xFLAG-CMV14-human ACE2, accession number: NP_068576          | (Li et al., 2021) | N/A |
| p3xFLAG-CMV14-squirrel ACE2, accession number: XP_026252505    | (Li et al., 2021) | N/A |
| p3xFLAG-CMV14-pangolin ACE2, accession number: XP_017505746    | (Li et al., 2021) | N/A |
| p3xFLAG-CMV14-fox ACE2, accession number: XP_025842512         | (Li et al., 2021) | N/A |
| p3xFLAG-CMV14-civet ACE2, accession number: AAX63775           | (Li et al., 2021) | N/A |
| p3xFLAG-CMV14-camel ACE2, accession number: XP_006194263       | (Li et al., 2021) | N/A |
| p3xFLAG-CMV14-ferret ACE2, accession number: NP_001297119      | (Li et al., 2021) | N/A |
| p3xFLAG-CMV14-rat ACE2, accession number: NP_001012006         | (Li et al., 2021) | N/A |
| p3xFLAG-CMV14-mouse ACE2, accession number: NP_001123985       | (Li et al., 2021) | N/A |
| p3xFLAG-CMV14-pig ACE2, accession number: NP_001116542         | (Li et al., 2021) | N/A |
| p3xFLAG-CMV14-guinea pig ACE2 accession number: ACT66270       | (Li et al., 2021) | N/A |
| p3xFLAG-CMV14-deer ACE2 accession number: XP_020768965         | (Li et al., 2021) | N/A |
| p3xFLAG-CMV14-hedgehog ACE2 accession number: XP_004710002     | (Li et al., 2021) | N/A |
| p3xFLAG-CMV14-koala ACE2 accession number: XP_020863153        | (Li et al., 2021) | N/A |
| p3xFLAG-CMV14-turtle ACE2 accession number: XP_006122891       | (Li et al., 2021) | N/A |
| p3xFLAG-CMV14-deer mice ACE2, accession number: XP_006973269.1 | This study        | N/A |
| p3xFLAG-CMV14-dog ACE2, accession number: NP_001158732.1       | This study        | N/A |
| p3xFLAG-CMV14-raccoon dog ACE2, accession number: ABW16956.1   | This study        | N/A |
| p3xFLAG-CMV14-otter ACE2, accession number: XP_032736029.1     | This study        | N/A |
| p3xFLAG-CMV14-tiger ACE2, accession number: XP_042830021.1     | This study        | N/A |
| p3xFLAG-CMV14-cat ACE2, accession number: AAX59005.1           | This study        | N/A |
| p3xFLAG-CMV14-horse ACE2, accession number: XP_001490241.1     | This study        | N/A |

|                                                                               |                   |                                                                                                                       |
|-------------------------------------------------------------------------------|-------------------|-----------------------------------------------------------------------------------------------------------------------|
| p3xFLAG-CMV14-alpaca ACE2, accession number: XP_006212709.1                   | This study        | N/A                                                                                                                   |
| p3xFLAG-CMV14-white-tailed deer ACE2, accession number: XP_020768965.1        | This study        | N/A                                                                                                                   |
| p3xFLAG-CMV14-bovine ACE2, accession number: NP_001019673.2                   | This study        | N/A                                                                                                                   |
| p3xFLAG-CMV14-goat ACE2, accession number: NP_001277036.1                     | This study        | N/A                                                                                                                   |
| p3xFLAG-CMV14-sheep ACE2, accession number: XP_011961657.1                    | This study        | N/A                                                                                                                   |
| p3xFLAG-CMV14-tree shrews ACE2, accession number: QNV47311.1                  | This study        | N/A                                                                                                                   |
| p3xFLAG-CMV14-R.affinis bat ACE2, accession number: QMQ39244                  | (Li et al., 2021) | N/A                                                                                                                   |
| p3xFLAG-CMV14-R.sinicus-YN bat ACE2, accession number: AGZ48803               | (Li et al., 2021) | N/A                                                                                                                   |
| p3xFLAG-CMV14-R.sinicus-HB bat ACE2, accession number: ADN93475               | (Li et al., 2021) | N/A                                                                                                                   |
| p3xFLAG-CMV14-R.macrotis bat ACE2, accession number: ADN93471.1               | This study        | N/A                                                                                                                   |
| p3xFLAG-CMV14-R.siamensis bat ACE2                                            | This study        | N/A                                                                                                                   |
| p3xFLAG-CMV14-R.pusillus bat ACE2, accession number: ADN93477.1               | This study        | N/A                                                                                                                   |
| p3xFLAG-CMV14-R.malayanus bat ACE2                                            | This study        | N/A                                                                                                                   |
| p3xFLAG-CMV14-R.shameli bat ACE2, accession number: UBB59645                  | This study        | N/A                                                                                                                   |
| p3xFLAG-CMV14-R.pearsonii bat ACE2, accession number:QKE49996.1               | This study        | N/A                                                                                                                   |
| p3xFLAG-CMV14-R. luctus bat ACE2                                              | This study        | N/A                                                                                                                   |
| p3xFLAG-CMV14-R.ferrumequinum bat ACE2, accession number: XP_032963186.1      | This study        | N/A                                                                                                                   |
| p3xFLAG-CMV14-Hipposideros armiger bat ACE2, accession number: XP_019522954.1 | This study        | N/A                                                                                                                   |
| p3xFLAG-CMV14-H. pratti accession number: QKE49995.1                          | This study        | N/A                                                                                                                   |
| p3xFLAG-CMV14-Pipistrellus abramus bat ACE2, accession number: ACT66266       | This study        | N/A                                                                                                                   |
| <b>Software and algorithms</b>                                                |                   |                                                                                                                       |
| Adobe Illustrator 2021                                                        | Adobe             | <a href="https://www.adobe.com/">https://www.adobe.com/</a>                                                           |
| GraphPad Prism 9.3.1                                                          | GraphPad          | <a href="https://www.graphpad.com/scientific-software/prism/">https://www.graphpad.com/scientific-software/prism/</a> |
| Image Lab 3.0                                                                 | Bio-Rad           | N/A                                                                                                                   |
